# Supplementary material for: Hypocellular myelodysplastic syndromes (h-MDS): from clinical description to immunological characterization in the Italian multi-center experience
Source: PubMed Central journal article supplement (PMC9252912; doi:10.1038/s41375-022-01592-3), 2022-05-21
Supplement: 41375_2022_1592_MOESM1_ESM.pdf [file 41375_2022_1592_MOESM1_ESM.pdf]

**Supplementary Table 1. Clinical and molecular features of h-MDS patients (N=12, enrolled in the FISiM-hMDS14 sub-study) at the diagnosis.**

| PATIENT  | AGE/<br>SEX | IPSS-R | Hb   | MCV   | ANC  | PLT | Blasts<br>BM (%) | STAT3*<br>MUT | MYELOID<br>MUT   |
|----------|-------------|--------|------|-------|------|-----|------------------|---------------|------------------|
| h-MDS 1  | 64/F        | HR     | 9.7  | 114.9 | 0.33 | 78  | <2%              | WT            | ND               |
| h-MDS 2  | 82/F        | HR     | 8.7  | ND    | 1.59 | 7   | <2%              | WT            | JAK2             |
| h-MDS 3  | 84/M        | HR     | 9.6  | 112.3 | 0.80 | 100 | <2%              | N647I         | ND               |
| h-MDS 4  | 85/F        | HR     | 9.9  | 96.1  | 0.26 | 136 | 2-4%             | Y640F         | ND               |
| h-MDS 5  | 97/F        | HR     | 9.9  | 116.3 | 1.4  | 23  | <5%              | WT            | ND               |
| h-MDS 6  | 66/ND       | HR     | 9.0  | 112   | 1.02 | 188 | 5-10%            | WT            | SF3B1, TET2      |
| h-MDS 7  | 81/M        | HR     | 8.7  | 97    | ND   | 10  | <2%              | WT            | DNMT3A           |
| h-MDS 8  | 42/M        | LR     | 11.4 | 109   | ND   | 83  | <2%              | WT            | CEBPA            |
| h-MDS 9  | 38/F        | LR     | 10.9 | 87.8  | 2.4  | 141 | 2-4%             | WT            | CEBPA,<br>DNMT3A |
| h-MDS 10 | 80/F        | LR     | 11.6 | 97    | 1.23 | 126 | <2%              | WT            | ND               |
| h-MDS 11 | 89/ND       | LR     | 11.5 | 102   | 1.10 | 106 | <2%              | WT            | ND               |
| h-MDS 12 | 64/F        | LR     | 12.8 | 105   | 1.07 | 85  | <2%              | WT            | DNMT3A           |

\*All patients were wild-type in STAT5b (exons 16-18).

Note: ANC, absolute neutrophil count; BM, bone marrow; F, female; Hb, hemoglobin; HR, higher risk; IPSS-R, Revised International Prognostic Scoring System; LR, lower risk; M, male; MUT, mutations; ND, not determined; PB, peripheral blood; PLT, platelets; Pt, patient.

**Supplementary Table 2. Immunophenotypic and clonality evaluation of h-MDS (N=12) with respect to healthy controls (N=25)**

|                                | PB                 |                    |                     |                     |                     | BM                 |                    |                     |                     |                     | TCR REARRANGMENT | KIR - NKG2 RESTRICTION* |
|--------------------------------|--------------------|--------------------|---------------------|---------------------|---------------------|--------------------|--------------------|---------------------|---------------------|---------------------|------------------|-------------------------|
|                                | CD3+CD4+ (% on Ly) | CD3+CD8+ (% on Ly) | CD3+CD57+ (% on Ly) | CD3-CD16+ (% on Ly) | CD3-CD56+ (% on Ly) | CD3+CD4+ (% on Ly) | CD3+CD8+ (% on Ly) | CD3+CD57+ (% on Ly) | CD3-CD16+ (% on Ly) | CD3-CD56+ (% on Ly) |                  |                         |
| <b>h-MDS 1</b>                 | 46                 | 43                 | 26                  | 3                   | 7                   | 40                 | 45                 | 25                  | 2                   | 3                   | Clonal           | NO                      |
| <b>h-MDS 2</b>                 | 11                 | 65                 | 25                  | 12                  | 20                  | 17                 | 61                 | 24                  | 5                   | 5                   | Clonal           | NO                      |
| <b>h-MDS 3</b>                 | 26                 | 68                 | 30                  | 2                   | 1                   | 16                 | 75                 | 24                  | 1                   | 1                   | Clonal           | NO                      |
| <b>h-MDS 4</b>                 | 40                 | 54                 | 46                  | 3                   | 1                   | 30                 | 61                 | 46                  | 2                   | 1                   | Clonal           | NO                      |
| <b>h-MDS 5</b>                 | 44                 | 25                 | 16                  | 2                   | 3                   | 42                 | 28                 | 14                  | 5                   | 5                   | Clonal           | NO                      |
| <b>h-MDS 6</b>                 | 49                 | 29                 | 8                   | 19                  | 22                  | 31                 | 36                 | 11                  | 22                  | 21                  | Policlonal       | CD158B, NKG2C           |
| <b>h-MDS 7</b>                 | 61                 | 20                 | 7                   | 8                   | 13                  | 55                 | 29                 | 7                   | 5                   | 10                  | Policlonal       | NO                      |
| <b>h-MDS 8</b>                 | 35                 | 45                 | 22                  | 6                   | 10                  | 30                 | 48                 | 28                  | 10                  | 11                  | Clonal           | NO                      |
| <b>h-MDS 9</b>                 | 43                 | 24                 | 8                   | 21                  | 20                  | 40                 | 26                 | 8                   | 20                  | 21                  | Policlonal       | CD158B                  |
| <b>h-MDS 10</b>                | 41                 | 39                 | 14                  | 29                  | 30                  | 47                 | 34                 | 15                  | 19                  | 19                  | Policlonal       | CD158B, NKG2C           |
| <b>h-MDS 11</b>                | 32                 | 38                 | 14                  | 23                  | 21                  | 20                 | 44                 | 13                  | 22                  | 19                  | Policlonal       | CD158B, NKG2C           |
| <b>h-MDS 12</b>                | 71                 | 18                 | 6                   | 2                   | 3                   | 46                 | 34                 | 16                  | 7                   | 8                   | Policlonal       | NO                      |
| <b>CTR (N=25) range values</b> | 47% ± 7            | 30% ± 7            | 6% ± 3              | 13% ± 5             | 13% ± 5             | 31% ± 7            | 28% ± 7            | 4% ± 2              | 6% ± 5              | 6% ± 5              | Policlonal       | NO                      |

\* KIR: a restricted pattern of Killer Immunoglobulin-like receptors (KIR) include the dominant expression of a relevant KIR or the lack of KIR expression, as compared to healthy controls (CTR). Normal values, referred to the gate of CD3-CD16+ lymphocytes, are: CD158a: 20%±10; CD158b: 30%±10; CD158e: 13%±5; NKG2A: 45%±20; NKG2C: <5%.

Note: BM, bone marrow; CD, cluster of differentiation; CTR, healthy controls; KIR, Killer Immunoglobulin-like receptor; h-MDS, hypoplastic Myelodysplastic syndrome; Ly, lymphocytes; N, number; PB, peripheral blood; TCR, T cell Receptor.

**Supplementary Table 3. Patients and first line therapies for h-MDS in comparison with n-MDS patients.**

| MDS (N)                        | h-MDS (336)           |                      | n-MDS (1609)           |                       |
|--------------------------------|-----------------------|----------------------|------------------------|-----------------------|
| BM Cellularity                 | ≤ 30%                 |                      | > 30%                  |                       |
| Age (median)                   | 75                    |                      | 74                     |                       |
| Sex (M/F)                      | 1.14                  |                      | 1.67                   |                       |
| <b>IPSS-R (N, %)</b>           | <b>LR (271, 80.7)</b> | <b>HR (65, 19.3)</b> | <b>LR (1176, 73.1)</b> | <b>HR (433, 26.9)</b> |
| <b>Therapy (%)</b>             |                       |                      |                        |                       |
| Observation/BSC                | 33.8                  | 12.1                 | 31.6                   | 16.1                  |
| ESA                            | 42.6                  | 29.3                 | 41.2                   | 24.8                  |
| Lenalidomide                   | 3.8                   | 0                    | 0.7                    | 0.5                   |
| Differentiation therapy (ATRA) | 4.6                   | 5.2                  | 6.4                    | 7.9                   |
| <b>IST</b>                     | <b>0.4</b>            | <b>0</b>             | <b>1.2</b>             | <b>0.5</b>            |
| Azacitidine                    | 5.1                   | 36.2                 | 2.8                    | 25.1                  |
| Low-dose Chemotherapy          | 0                     | 0                    | 4.7                    | 5.0                   |
| AML-Like Chemotherapy          | 0.4                   | 1.7                  | 0.3                    | 6.2                   |
| HSCT                           | 0                     | 1.7                  | 0.1                    | 1.0                   |
| Experimental trials            | 1.7                   | 5.2                  | 3.9                    | 6.2                   |
| Others                         | 7.6                   | 8.6                  | 7.1                    | 6.7                   |

Note: AML, acute myeloid leukemia; ATRA, All-trans retinoic acid; BM, bone marrow; BSC, best supportive care; ESA, Erythroid stimulating agents; F, female; h-MDS, hypocellular myelodysplastic syndromes; HR, higher risk; HSCT, hematopoietic stem cell transplant; IPSS-R, Revised International Prognostic Scoring System; IST, immunosuppressive therapy; LR, lower risk; M, male; N, number; n-MDS, normo-/hypercellular myelodysplastic syndromes;
